# Supplementary material for: Histone H1.2 Inhibited EMCV Replication through Enhancing MDA5-Mediated IFN-β Signaling Pathway
Source: MDPI journal article supplement (doi:10.3390/v16020174), 2024-01-24
Supplement: s1 [file s1]

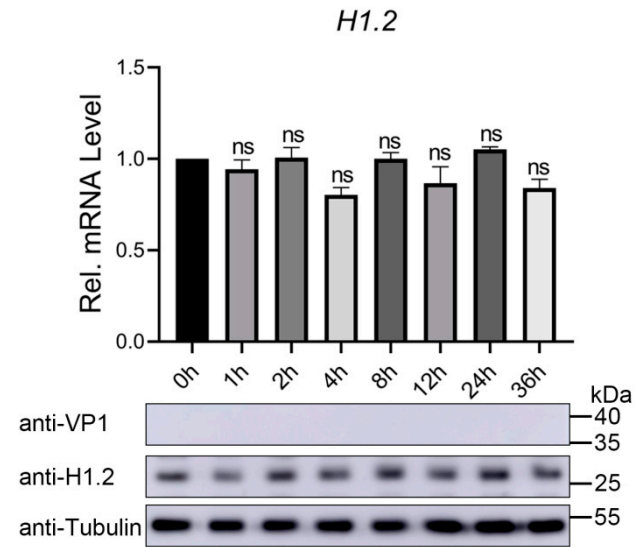

**Figure S1.** The effect of EMCV infection on H1.2 expression. HEK293T cells were infected with inactivated EMCV (0.0001 MOI) by a UV dose of 100 mJ/cm<sup>2</sup> at 0 h, 1 h, 2 h, 4 h, 8 h, 12 h, 24 h and 36 h. RT-qPCR (up) and Immunoblotting (down) were used to detect the H1.2 expression. Data were listed as mean  $\pm$  SD of three independent experiments and measured in technical duplicate.

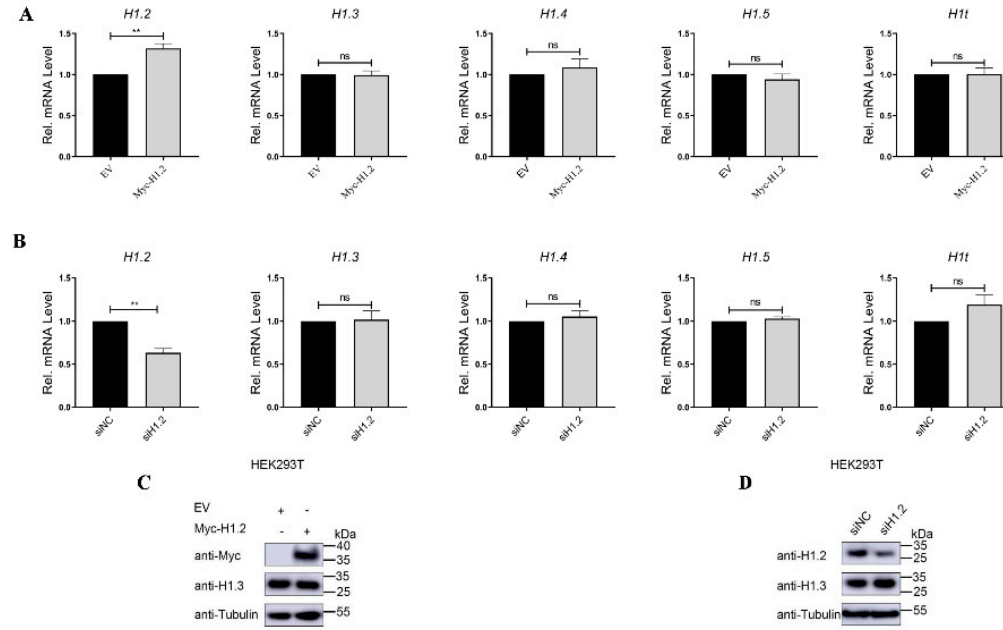

**Figure S2.** Over expression or downregulation of H1.2 effect on the 5 members of H1 family. (A) HEK293T cells were transfected with empty vector (EV, 1  $\mu$ g) or the pCMV-Myc-H1.2 plasmids (1  $\mu$ g). H1.2, H1.3, H1.4, H1.5 and H1t mRNA levels were measured by RT-qPCR. Empty vector (EV) groups were used as a control. (B) HEK293T cells were transfected with siRNA targeting H1.2 (si003). H1.2, H1.3, H1.4, H1.5 and H1t mRNA levels were measured by RT-qPCR. siNC groups were used as control. (C) HEK293T cells were transfected with empty vector (EV, 1  $\mu$ g) or the pCMV-Myc-H1.2 plasmids (1  $\mu$ g). Immunoblotting was used to analyze the protein expression of Myc-H1.2 and H1.3. Tubulin was used as a loading control. (D) siRNA targeting H1.2 (si003) was transfected into HEK293T cells for 24 h. The protein expression of H1.2 and H1.3 were analyzed by immunoblotting. Tubulin was used as a loading control. Data were listed as mean  $\pm$  SD of three independent experiments and measured in technical duplicate. \*\*  $p < 0.01$ .

Table S1 Fourteen proteins significantly regulated during EMCV infection were identified by MS

| No. | Accession         | Description                                                                   | Coverage          | Number of AAs | MW in kDa     | Number of Peptides Sequest HT | Number of PSMs Sequest HT | FC(1h-0h)      | FC(2h-0h)      | FC(4h-0h)      |
|-----|-------------------|-------------------------------------------------------------------------------|-------------------|---------------|---------------|-------------------------------|---------------------------|----------------|----------------|----------------|
| 1   | A0A1U8CAE9        | LOW QUALITY PROTEIN: voltage-dependent anion-selective channel protein 1-like | 15.7142857        | 280           | 30.204        | 3                             | 19                        | 1.48954        | 1.73415        | 1.71262        |
| 2   | A0A1U8BR66        | histone H1.3 OS=Mesocricetus auratus                                          | 17.7272727        | 220           | 21.963        | 4                             | 126                       | 1.84006        | 2.23189        | 2.12712        |
| 3   | A0A1U8D0V7        | cAMP-dependent protein kinase catalytic subunit alpha                         | 14.8997135        | 349           | 40.181        | 3                             | 9                         | 0.81528        | 0.74854        | 0.7927         |
| 4   | A0A1U8CQH7        | hydroxymethylglutaryl-CoA synthase, cytoplasmic                               | 14.2307692        | 520           | 57.386        | 8                             | 21                        | 0.74812        | 0.82263        | 0.82108        |
| 5   | A0A1U7Q8Z0        | histone H1.4 OS=Mesocricetus auratus                                          | 17.8082192        | 219           | 21.882        | 4                             | 126                       | 1.84006        | 2.23189        | 2.12712        |
| 6   | A0A1U7QJZ4        | non-histone chromosomal protein HMG-14                                        | 31.9587629        | 97            | 10.169        | 1                             | 9                         | 1.29871        | 1.38178        | 1.47638        |
| 7   | A0A1U8BSH4        | histone H1.5-like                                                             | 18.4210526        | 152           | 16.286        | 3                             | 33                        | 1.49008        | 1.70657        | 1.66931        |
| 8   | <b>A0A1U7Q3S0</b> | <b>histone H1.2</b>                                                           | <b>18.4834123</b> | <b>211</b>    | <b>21.155</b> | <b>4</b>                      | <b>53</b>                 | <b>1.49392</b> | <b>1.76109</b> | <b>1.69148</b> |
| 9   | A0A1U8BYF8        | cytochrome c oxidase subunit 4 isoform 1, mitochondrial                       | 26.6272189        | 169           | 19.623        | 4                             | 38                        | 1.20354        | 1.35715        | 1.32123        |
| 10  | A0A1U7RDX1        | histone H1.5                                                                  | 17.6470588        | 221           | 22.434        | 4                             | 53                        | 1.49392        | 1.76109        | 1.69148        |
| 11  | A0A1U7QCZ4        | transmembrane protein 43                                                      | 18.8679245        | 265           | 29.348        | 3                             | 20                        | 1.33345        | 1.57364        | 1.58108        |
| 12  | A0A1U7QFH8        | histone H1t                                                                   | 5.28846154        | 208           | 21.711        | 1                             | 91                        | 1.97067        | 2.36031        | 2.22152        |
| 13  | A0A1U7QK94        | cytochrome c oxidase subunit 5A, mitochondrial                                | 18.0451128        | 133           | 14.612        | 2                             | 18                        | 1.24061        | 1.40206        | 1.29094        |
| 14  | A0A1U7Q2N9        | NADH dehydrogenase [ubiquinone] 1 beta subcomplex subunit 8, mitochondrial    | 26.8817204        | 186           | 21.516        | 4                             | 6                         | 1.33653        | 1.42121        | 1.45029        |
